# Supplementary material for: Radical reactions of diamine bis(phenolate) vanadium(iii) complexes. Solid state binding of O2 to form a vanadium(v) peroxo complex
Source: Royal Society of Chemistry journal article supplement (doi:10.1039/c7dt01699a), 2017-01-01
Supplement: c7dt01699a1.pdf [file c7dt01699a1.pdf]

## Electronic Supplementary Information

### Radical reactions of diamine bis(phenolate) vanadium(III) complexes. Activation of O<sub>2</sub> and TEMPO

Sónia Barroso,<sup>[a]</sup> Ana M. Coelho,<sup>[a]</sup> Pedro Adão,<sup>[a]</sup> Maria José Calhorda,<sup>[b]</sup> Ana. M. Martins\*<sup>[a]</sup>

[a] Centro de Química Estrutural, Instituto Superior Técnico, Universidade de Lisboa, Av. Rovisco Pais, 1049-001 Lisboa, Portugal.

[b] Departamento de Química e Bioquímica, Faculdade de Ciências, Universidade de Lisboa, Campo Grande, Ed. C8, 1749-016 Lisboa, Portugal

E-mail: [ana.martins@ist.utl.pt](mailto:ana.martins@ist.utl.pt)

#### 1. Sulfoxidation results:

**Table S1.** Sulfoxidation of Thioanisole using vanadium complexes **6** and **8** as catalyst precursors.

|   | Catalyst | Solvent | Oxidant<br><sup>b,c</sup>     | <i>n</i> Ox./<br><i>n</i> S | mol %<br>cat. <sup>a</sup> | T/°C | <i>t</i> /h | conv.<br>(%) | ee (%) | sulfone<br>(%) |
|---|----------|---------|-------------------------------|-----------------------------|----------------------------|------|-------------|--------------|--------|----------------|
| 1 | <b>6</b> | DCE     | H <sub>2</sub> O <sub>2</sub> | 1.2                         | 1                          | 10   | 24          | >99          | 0      | 21             |
| 2 | <b>8</b> | DCE     | TBHP                          | 1.2                         | 2                          | 10   | 20          | 54           | 0      | 0              |
| 3 | <b>8</b> | DCE     | H <sub>2</sub> O <sub>2</sub> | 1.2                         | 2                          | 10   | 20          | 93           | 0      | 5              |

<sup>a</sup> Thioanisole (1 mmol). <sup>b</sup> H<sub>2</sub>O<sub>2</sub> 20% (w/v) aqueous solution. <sup>c</sup> TBHP 5.5 M in decane.

## 2. NMR data for TEMPO-CH<sub>2</sub>Ph:

<sup>1</sup>H NMR (300 MHz, C<sub>6</sub>D<sub>6</sub>, ppm):  $\delta$  7.35 (d, 2H, <sup>4</sup>J<sub>HH</sub> = 6.5 Hz, Ph), 7.16 (m, 3H, Ph), 4.90 (s, 2H, CH<sub>2</sub>Ph), 1.49 (m, 3H, CH<sub>2</sub> TEMPO), 1.33 (m, 2H, CH<sub>2</sub> TEMPO), 1.16 (m, 1H, CH<sub>2</sub> TEMPO). <sup>13</sup>C-<sup>1</sup>H NMR (75 MHz, C<sub>6</sub>D<sub>6</sub>, ppm):  $\delta$  135.2 (C<sub>ipso</sub>-Ph), 128.9, 128.7 and 127.9 (CH-Ph), 79.7 (CH<sub>2</sub>Ph), 60.4 (C<sub>ipso</sub>-TEMPO), 40.4 (CH<sub>2</sub> TEMPO), 33.7 (CH<sub>3</sub> TEMPO), 20.7 (CH<sub>3</sub> TEMPO), 17.8 (CH<sub>2</sub> TEMPO).

### 3. Atom coordinates for the optimized molecules:

2\*

|    |              |             |             |   |              |             |              |
|----|--------------|-------------|-------------|---|--------------|-------------|--------------|
| 23 | 7.948246000  | 3.607444000 | 5.532697000 | 6 | 9.310065000  | 6.883526000 | 8.042896000  |
| 17 | 7.569617000  | 1.757075000 | 6.885758000 | 1 | 10.098899000 | 7.490155000 | 7.586922000  |
| 8  | 6.404303000  | 3.492374000 | 4.513127000 | 1 | 8.760158000  | 7.540286000 | 8.721512000  |
| 8  | 9.589975000  | 3.086097000 | 4.844450000 | 6 | 9.467042000  | 4.468372000 | 7.920631000  |
| 7  | 8.304721000  | 5.592098000 | 4.571339000 | 1 | 10.195766000 | 4.289185000 | 7.123695000  |
| 7  | 8.173400000  | 4.865514000 | 7.288238000 | 1 | 9.331013000  | 3.526223000 | 8.453642000  |
| 6  | 11.917681000 | 3.148442000 | 4.461769000 | 6 | 9.886261000  | 5.659386000 | 8.782414000  |
| 6  | 10.633673000 | 3.709626000 | 4.293937000 | 1 | 10.972267000 | 5.707112000 | 8.891866000  |
| 6  | 13.008083000 | 3.794278000 | 3.889727000 | 1 | 9.465841000  | 5.577270000 | 9.788700000  |
| 1  | 13.996334000 | 3.355698000 | 4.020025000 | 6 | 5.681331000  | 4.892398000 | 7.668106000  |
| 6  | 7.004835000  | 6.227210000 | 4.237580000 | 1 | 4.931022000  | 4.704638000 | 8.441517000  |
| 1  | 7.187237000  | 7.257203000 | 3.892438000 | 1 | 5.503378000  | 4.179607000 | 6.857016000  |
| 1  | 6.427185000  | 6.291143000 | 5.166702000 | 1 | 5.506388000  | 5.905412000 | 7.291137000  |
| 6  | 6.211324000  | 5.480476000 | 3.211063000 | 6 | 7.061386000  | 4.711281000 | 8.272595000  |
| 6  | 5.937102000  | 4.124389000 | 3.433785000 | 1 | 7.143184000  | 3.695115000 | 8.663432000  |
| 6  | 9.111212000  | 5.451348000 | 3.330509000 | 1 | 7.212466000  | 5.417976000 | 9.099881000  |
| 1  | 9.186306000  | 6.432584000 | 2.836487000 | 6 | 12.059814000 | 1.872076000 | 5.234775000  |
| 1  | 8.531946000  | 4.802424000 | 2.663915000 | 1 | 11.685613000 | 1.978979000 | 6.258527000  |
| 6  | 5.150494000  | 3.406866000 | 2.509685000 | 1 | 11.464426000 | 1.072967000 | 4.781492000  |
| 6  | 10.482815000 | 4.894423000 | 3.557002000 | 1 | 13.103907000 | 1.551328000 | 5.276849000  |
| 6  | 4.663503000  | 4.077282000 | 1.393346000 | 6 | 14.086324000 | 5.637343000 | 2.540174000  |
| 1  | 4.057601000  | 3.520714000 | 0.679943000 | 1 | 14.903572000 | 5.740131000 | 3.262141000  |
| 6  | 11.606921000 | 5.515884000 | 3.008968000 | 1 | 14.474527000 | 5.053287000 | 1.697374000  |
| 1  | 11.475019000 | 6.437937000 | 2.444452000 | 1 | 13.846117000 | 6.635628000 | 2.163609000  |
| 6  | 12.882767000 | 4.979923000 | 3.156572000 | 6 | 4.871523000  | 1.956326000 | 2.760503000  |
| 6  | 9.019331000  | 6.402262000 | 5.567948000 | 1 | 4.253498000  | 1.530467000 | 1.965963000  |
| 1  | 9.063408000  | 7.458714000 | 5.257243000 | 1 | 5.802050000  | 1.382919000 | 2.826684000  |
| 1  | 10.052484000 | 6.042080000 | 5.605424000 | 1 | 4.359820000  | 1.813845000 | 3.717869000  |
| 6  | 5.709508000  | 6.114986000 | 2.073709000 | 6 | 4.374706000  | 6.114420000 | -0.071159000 |
| 1  | 5.935802000  | 7.167957000 | 1.911898000 | 1 | 4.669015000  | 5.595244000 | -0.989969000 |
| 6  | 8.385428000  | 6.303463000 | 6.948319000 | 1 | 3.279031000  | 6.142645000 | -0.055796000 |
| 1  | 7.411996000  | 6.798495000 | 6.947559000 | 1 | 4.730145000  | 7.146007000 | -0.144476000 |
| 6  | 4.925717000  | 5.431124000 | 1.149526000 |   |              |             |              |

7\*

|    |              |              |             |   |              |              |             |
|----|--------------|--------------|-------------|---|--------------|--------------|-------------|
| 23 | 1.130991000  | 3.626328000  | 5.053846000 | 6 | 3.411726000  | 2.532340000  | 7.291235000 |
| 17 | 1.999812000  | 5.316205000  | 6.351733000 | 1 | 3.590835000  | 2.133672000  | 8.299541000 |
| 8  | -0.481631000 | 3.510029000  | 5.886852000 | 1 | 3.550223000  | 3.614389000  | 7.338247000 |
| 8  | 2.660496000  | 3.214946000  | 4.148773000 | 6 | 1.185121000  | 2.737612000  | 8.163031000 |
| 8  | 0.279166000  | 3.842716000  | 3.474003000 | 1 | 0.160341000  | 2.939848000  | 7.851366000 |
| 8  | 0.697020000  | 5.041925000  | 4.019380000 | 1 | 1.591880000  | 3.666978000  | 8.562793000 |
| 6  | 2.705578000  | 2.764549000  | 2.885465000 | 6 | -1.692389000 | 3.114520000  | 5.474084000 |
| 7  | 1.965560000  | 2.341042000  | 6.954512000 | 6 | 0.438163000  | 0.736925000  | 5.880114000 |
| 7  | 0.590932000  | 1.444694000  | 4.593301000 | 1 | -0.459156000 | 1.121830000  | 6.369027000 |
| 6  | 2.142691000  | 1.038697000  | 1.299491000 | 1 | 0.267386000  | -0.334901000 | 5.690976000 |
| 1  | 1.696933000  | 0.069254000  | 1.083321000 | 6 | -3.145149000 | 1.694369000  | 4.182714000 |
| 6  | -4.273317000 | 2.311254000  | 4.713753000 | 1 | -3.269869000 | 0.887614000  | 3.461928000 |
| 6  | 1.355683000  | 0.323120000  | 8.199098000 | 6 | 2.720258000  | 1.780551000  | 0.268956000 |
| 1  | 2.153905000  | -0.352040000 | 8.518131000 | 6 | 4.434384000  | 1.935559000  | 6.340978000 |
| 1  | 0.431480000  | -0.264452000 | 8.190221000 | 1 | 5.424472000  | 2.275546000  | 6.660304000 |
| 6  | -4.081118000 | 3.339117000  | 5.643681000 | 1 | 4.274964000  | 2.275752000  | 5.317931000 |
| 1  | -4.948790000 | 3.834753000  | 6.075120000 | 1 | 4.461491000  | 0.840812000  | 6.360609000 |
| 6  | 3.284798000  | 3.545184000  | 1.874209000 | 6 | -2.815846000 | 3.751930000  | 6.039343000 |
| 6  | 1.617824000  | 0.741558000  | 3.771262000 | 6 | 1.640047000  | 0.900494000  | 6.791499000 |
| 1  | 2.459977000  | 0.524844000  | 4.432114000 | 6 | -1.851942000 | 2.083065000  | 4.537452000 |
| 1  | 1.201899000  | -0.221745000 | 3.441323000 | 6 | 2.135337000  | 1.520616000  | 2.605008000 |
| 6  | -0.692769000 | 1.402407000  | 3.860001000 | 6 | 1.242764000  | 1.548306000  | 9.123213000 |
| 1  | -0.954511000 | 0.345647000  | 3.689685000 | 1 | 2.105407000  | 1.611823000  | 9.792949000 |
| 1  | -0.512841000 | 1.850347000  | 2.877214000 | 1 | 0.353048000  | 1.513517000  | 9.757294000 |

|   |              |             |              |   |              |             |              |
|---|--------------|-------------|--------------|---|--------------|-------------|--------------|
| 6 | 3.280898000  | 3.024144000 | 0.582771000  | 1 | -1.905489000 | 5.598063000 | 6.652535000  |
| 1 | 3.722363000  | 3.618743000 | -0.215190000 | 6 | 3.854109000  | 4.889587000 | 2.209788000  |
| 1 | 2.501608000  | 0.404490000 | 6.345032000  | 1 | 3.113353000  | 5.492873000 | 2.744102000  |
| 6 | -5.657302000 | 1.902586000 | 4.294295000  | 1 | 4.722550000  | 4.798887000 | 2.871300000  |
| 1 | -5.646365000 | 0.956122000 | 3.746942000  | 1 | 4.163989000  | 5.421770000 | 1.307174000  |
| 1 | -6.319738000 | 1.784594000 | 5.158000000  | 6 | 2.747138000  | 1.264136000 | -1.142694000 |
| 1 | -6.112136000 | 2.655812000 | 3.640219000  | 1 | 3.769227000  | 1.033740000 | -1.465052000 |
| 6 | -2.609031000 | 4.852800000 | 7.035668000  | 1 | 2.155009000  | 0.350706000 | -1.244741000 |
| 1 | -3.554461000 | 5.346276000 | 7.273749000  | 1 | 2.347050000  | 2.002290000 | -1.845733000 |
| 1 | -2.180096000 | 4.472059000 | 7.969714000  |   |              |             |              |

### 6\*

|    |             |              |              |   |             |              |              |
|----|-------------|--------------|--------------|---|-------------|--------------|--------------|
| 23 | 6.733005000 | 12.123755000 | 14.046060000 | 1 | 6.261257000 | 16.900374000 | 11.364380000 |
| 17 | 8.864532000 | 12.905099000 | 13.952080000 | 6 | 7.873837000 | 13.452656000 | 10.540880000 |
| 8  | 6.755858000 | 12.436889000 | 15.842567000 | 6 | 4.082656000 | 10.975108000 | 13.029047000 |
| 8  | 6.556571000 | 12.484780000 | 12.260060000 | 1 | 4.739905000 | 10.103851000 | 12.965450000 |
| 8  | 6.869606000 | 10.571599000 | 14.010476000 | 1 | 4.365628000 | 11.627784000 | 12.199433000 |
| 6  | 7.668516000 | 15.855523000 | 10.115136000 | 6 | 4.315694000 | 10.779441000 | 15.477780000 |
| 7  | 4.461632000 | 11.679839000 | 14.283674000 | 1 | 3.822418000 | 9.854546000  | 15.164081000 |
| 7  | 5.633938000 | 14.286808000 | 14.197457000 | 1 | 5.300555000 | 10.520344000 | 15.864531000 |
| 6  | 7.104135000 | 13.448657000 | 16.643755000 | 6 | 5.253225000 | 14.848599000 | 12.885737000 |
| 6  | 6.920922000 | 13.576059000 | 11.566463000 | 1 | 4.886678000 | 15.879811000 | 13.018983000 |
| 6  | 7.555232000 | 13.117265000 | 17.939047000 | 1 | 4.411125000 | 14.255660000 | 12.513997000 |
| 6  | 8.223297000 | 14.601852000 | 9.837475000  | 6 | 3.461614000 | 11.531225000 | 16.494206000 |
| 1  | 8.963482000 | 14.516701000 | 9.043695000  | 1 | 4.099765000 | 12.102650000 | 17.176291000 |
| 6  | 7.000015000 | 14.792747000 | 16.249618000 | 1 | 2.857117000 | 10.853082000 | 17.102398000 |
| 6  | 6.569223000 | 15.207954000 | 14.867230000 | 6 | 2.619980000 | 12.465360000 | 15.628321000 |
| 1  | 6.110425000 | 16.209692000 | 14.930234000 | 1 | 2.222361000 | 13.326400000 | 16.174968000 |
| 1  | 7.447309000 | 15.292852000 | 14.216585000 | 1 | 1.772877000 | 11.925522000 | 15.193878000 |
| 6  | 3.607617000 | 12.878612000 | 14.533951000 | 6 | 7.661395000 | 11.674047000 | 18.329520000 |
| 1  | 3.093232000 | 13.131370000 | 13.602124000 | 1 | 6.682879000 | 11.181024000 | 18.309754000 |
| 6  | 6.340773000 | 14.813990000 | 11.858570000 | 1 | 8.299159000 | 11.127532000 | 17.627648000 |
| 6  | 7.902311000 | 14.142796000 | 18.808470000 | 1 | 8.076582000 | 11.570381000 | 19.335031000 |
| 1  | 8.257134000 | 13.884806000 | 19.804596000 | 6 | 8.217502000 | 16.576069000 | 19.398058000 |
| 6  | 7.809894000 | 15.489778000 | 18.443196000 | 1 | 7.864253000 | 16.371002000 | 20.413669000 |
| 6  | 7.345834000 | 15.787670000 | 17.165115000 | 1 | 9.308949000 | 16.669064000 | 19.449001000 |
| 1  | 7.255382000 | 16.829614000 | 16.862343000 | 1 | 7.820289000 | 17.547907000 | 19.092334000 |
| 6  | 2.627238000 | 10.547893000 | 12.886023000 | 6 | 8.485439000 | 12.116686000 | 12.251720000 |
| 1  | 2.516070000 | 10.009776000 | 11.939780000 | 1 | 9.040147000 | 11.755325000 | 11.123590000 |
| 1  | 1.937896000 | 11.397524000 | 12.855843000 | 1 | 7.716259000 | 11.368566000 | 10.033725000 |
| 1  | 2.299691000 | 9.872693000  | 13.682377000 | 1 | 9.167900000 | 12.173531000 | 9.399977000  |
| 6  | 4.433091000 | 14.073092000 | 15.003734000 | 6 | 8.097158000 | 17.072312000 | 9.343424000  |
| 1  | 3.790656000 | 14.970230000 | 14.994840000 | 1 | 9.130136000 | 17.351529000 | 9.581529000  |
| 1  | 4.746916000 | 13.918403000 | 16.037350000 | 1 | 8.052157000 | 16.898572000 | 8.263064000  |
| 6  | 6.720045000 | 15.940450000 | 11.133216000 | 1 | 7.462417000 | 17.933264000 | 9.570445000  |

### A<sub>eq</sub>

|    |              |              |             |   |              |              |             |
|----|--------------|--------------|-------------|---|--------------|--------------|-------------|
| 17 | 1.772711000  | 5.485775000  | 6.019605000 | 6 | -4.106082000 | 3.357455000  | 5.675643000 |
| 8  | -0.498147000 | 3.405476000  | 5.965244000 | 1 | -4.966983000 | 3.854765000  | 6.119151000 |
| 8  | 2.707635000  | 3.071131000  | 4.275732000 | 6 | 3.391983000  | 3.527818000  | 2.021445000 |
| 8  | -0.182037000 | 4.472519000  | 2.641053000 | 6 | 1.547824000  | 0.718676000  | 3.721097000 |
| 8  | 0.423193000  | 4.134727000  | 3.688626000 | 1 | 2.372512000  | 0.422467000  | 4.374046000 |
| 6  | 2.743374000  | 2.728279000  | 2.972688000 | 1 | 1.085691000  | -0.202524000 | 3.338650000 |
| 7  | 1.949315000  | 2.430869000  | 6.906378000 | 6 | -0.738644000 | 1.439885000  | 3.847416000 |
| 7  | 0.552324000  | 1.430157000  | 4.576312000 | 1 | -1.013261000 | 0.398751000  | 3.616496000 |
| 6  | 2.108243000  | 1.138851000  | 1.269940000 | 1 | -0.546273000 | 1.939850000  | 2.889319000 |
| 1  | 1.611933000  | 0.211700000  | 0.988000000 | 6 | 3.413625000  | 2.713270000  | 7.134773000 |
| 6  | -4.313557000 | 2.369419000  | 4.705389000 | 1 | 3.607643000  | 2.668251000  | 8.213326000 |
| 6  | 1.407450000  | 0.417714000  | 8.194463000 | 1 | 3.562120000  | 3.750975000  | 6.829509000 |
| 1  | 2.174206000  | -0.308501000 | 8.477004000 | 6 | 1.228859000  | 2.819165000  | 8.152718000 |
| 1  | 0.445153000  | -0.103867000 | 8.237944000 | 1 | 0.176813000  | 2.958075000  | 7.902920000 |

|   |              |              |             |    |              |             |              |
|---|--------------|--------------|-------------|----|--------------|-------------|--------------|
| 1 | 1.614557000  | 3.776478000  | 8.508580000 | 1  | 3.877516000  | 3.699433000 | -0.051299000 |
| 6 | -1.722948000 | 3.090993000  | 5.516428000 | 1  | 2.516821000  | 0.496612000 | 6.314044000  |
| 6 | 0.436580000  | 0.741964000  | 5.877111000 | 6  | -5.703852000 | 2.004897000 | 4.265113000  |
| 1 | -0.468227000 | 1.101759000  | 6.368991000 | 1  | -5.701271000 | 1.112514000 | 3.633277000  |
| 1 | 0.314053000  | -0.340817000 | 5.717014000 | 1  | -6.357786000 | 1.807772000 | 5.121285000  |
| 6 | -3.194854000 | 1.750400000  | 4.160474000 | 1  | -6.164288000 | 2.815530000 | 3.688408000  |
| 1 | -3.328386000 | 0.975920000  | 3.406586000 | 6  | -2.615799000 | 4.782702000 | 7.141140000  |
| 6 | 2.742940000  | 1.908818000  | 0.296413000 | 1  | -3.560621000 | 5.246697000 | 7.434841000  |
| 6 | 4.429494000  | 1.826621000  | 6.436512000 | 1  | -2.148306000 | 4.363872000 | 8.039821000  |
| 1 | 5.417354000  | 2.271917000  | 6.591294000 | 1  | -1.940207000 | 5.562451000 | 6.775499000  |
| 1 | 4.254616000  | 1.780551000  | 5.361195000 | 6  | 4.055083000  | 4.802642000 | 2.446055000  |
| 1 | 4.473565000  | 0.814020000  | 6.851249000 | 1  | 3.337115000  | 5.477036000 | 2.924728000  |
| 6 | -2.836848000 | 3.728469000  | 6.098387000 | 1  | 4.842179000  | 4.613327000 | 3.183893000  |
| 6 | 1.650899000  | 0.973985000  | 6.770064000 | 1  | 4.499884000  | 5.318334000 | 1.591519000  |
| 6 | -1.897386000 | 2.100505000  | 4.544040000 | 6  | 2.729892000  | 1.501720000 | -1.151021000 |
| 6 | 2.108970000  | 1.539137000  | 2.603506000 | 1  | 3.727918000  | 1.569035000 | -1.596383000 |
| 6 | 1.415200000  | 1.648833000  | 9.115026000 | 1  | 2.378522000  | 0.473381000 | -1.273033000 |
| 1 | 2.364135000  | 1.721482000  | 9.655857000 | 1  | 2.069201000  | 2.147766000 | -1.740859000 |
| 1 | 0.621538000  | 1.618951000  | 9.866084000 | 23 | 1.105720000  | 3.558902000 | 5.065927000  |
| 6 | 3.379169000  | 3.088513000  | 0.699540000 |    |              |             |              |

### A<sub>ax</sub>

|    |             |              |              |   |             |              |              |
|----|-------------|--------------|--------------|---|-------------|--------------|--------------|
| 23 | 6.330519000 | 12.079846000 | 14.223753000 | 6 | 7.952784000 | 13.604681000 | 10.977953000 |
| 17 | 8.418856000 | 12.959687000 | 14.495601000 | 6 | 4.006549000 | 10.808617000 | 12.734424000 |
| 8  | 6.115617000 | 12.166134000 | 16.044619000 | 1 | 4.695652000 | 9.959035000  | 12.714457000 |
| 8  | 6.443534000 | 12.476129000 | 12.427611000 | 1 | 4.378226000 | 11.531965000 | 12.005378000 |
| 8  | 6.633105000 | 10.463781000 | 14.094265000 | 6 | 3.881642000 | 10.432127000 | 15.172834000 |
| 6  | 7.719488000 | 16.031114000 | 10.720866000 | 1 | 3.479348000 | 9.523774000  | 14.717777000 |
| 7  | 4.160656000 | 11.433701000 | 14.082400000 | 1 | 4.806628000 | 10.166341000 | 15.681245000 |
| 7  | 5.228035000 | 14.053768000 | 14.359950000 | 6 | 5.003098000 | 14.716189000 | 13.046067000 |
| 6  | 6.300119000 | 13.124223000 | 16.958888000 | 1 | 4.570795000 | 15.711810000 | 13.225268000 |
| 6  | 6.865578000 | 13.620119000 | 11.866705000 | 1 | 4.247763000 | 14.124438000 | 12.519579000 |
| 6  | 6.558188000 | 12.717901000 | 18.285246000 | 6 | 2.860297000 | 11.074581000 | 16.104502000 |
| 6  | 8.350060000 | 14.818127000 | 10.422580000 | 1 | 3.368000000 | 11.613501000 | 16.910676000 |
| 1  | 9.193388000 | 14.819112000 | 9.734113000  | 1 | 2.207591000 | 10.330386000 | 16.568307000 |
| 6  | 6.209230000 | 14.488786000 | 16.641285000 | 6 | 2.105487000 | 12.042265000 | 15.195619000 |
| 6  | 5.978120000 | 14.983023000 | 15.238287000 | 1 | 1.595595000 | 12.843480000 | 15.739780000 |
| 1  | 5.425567000 | 15.934989000 | 15.286835000 | 1 | 1.353716000 | 11.509789000 | 14.605119000 |
| 1  | 6.935013000 | 15.179247000 | 14.743140000 | 6 | 6.658582000 | 11.255229000 | 18.596595000 |
| 6  | 3.215902000 | 12.574534000 | 14.286872000 | 1 | 5.717496000 | 10.734847000 | 18.386348000 |
| 1  | 2.829646000 | 12.875674000 | 13.309064000 | 1 | 7.423146000 | 10.777012000 | 17.976276000 |
| 6  | 6.213783000 | 14.815738000 | 12.178035000 | 1 | 6.910344000 | 11.095420000 | 19.647885000 |
| 6  | 6.726031000 | 13.691905000 | 19.260636000 | 6 | 6.851825000 | 16.087038000 | 20.046764000 |
| 1  | 6.931439000 | 13.376613000 | 20.281946000 | 1 | 6.350276000 | 15.804162000 | 20.977725000 |
| 6  | 6.640199000 | 15.058136000 | 18.972241000 | 1 | 7.917281000 | 16.205122000 | 20.277449000 |
| 6  | 6.370356000 | 15.430323000 | 17.658709000 | 1 | 6.472262000 | 17.066671000 | 19.743415000 |
| 1  | 6.290003000 | 16.487766000 | 17.411660000 | 6 | 8.650720000 | 12.313632000 | 10.681869000 |
| 6  | 2.607137000 | 10.347494000 | 12.348160000 | 1 | 9.071682000 | 11.891884000 | 11.600395000 |
| 1  | 2.659976000 | 9.891880000  | 11.354827000 | 1 | 7.954901000 | 11.568682000 | 10.282177000 |
| 1  | 1.889191000 | 11.171602000 | 12.285964000 | 1 | 9.458269000 | 12.458974000 | 9.960068000  |
| 1  | 2.201940000 | 9.591316000  | 13.027071000 | 6 | 8.207959000 | 17.318653000 | 10.117865000 |
| 6  | 3.914656000 | 13.750896000 | 14.956142000 | 1 | 9.152371000 | 17.638520000 | 10.573735000 |
| 1  | 3.264974000 | 14.638366000 | 14.898190000 | 1 | 8.388320000 | 17.214963000 | 9.043005000  |
| 1  | 4.071047000 | 13.538167000 | 16.014424000 | 1 | 7.484494000 | 18.126323000 | 10.259838000 |
| 6  | 6.642918000 | 16.010183000 | 11.606729000 | 8 | 6.515277000 | 9.204795000  | 13.964281000 |
| 1  | 6.125257000 | 16.936481000 | 11.850511000 |   |             |              |              |

### B<sub>ax</sub>

|    |             |              |              |   |             |              |              |
|----|-------------|--------------|--------------|---|-------------|--------------|--------------|
| 23 | 6.172348000 | 12.222467000 | 13.767252000 | 8 | 6.120370000 | 12.904712000 | 12.074336000 |
| 17 | 8.492750000 | 12.428109000 | 13.714347000 | 8 | 5.987997000 | 10.464352000 | 13.395565000 |
| 8  | 6.290170000 | 12.139207000 | 15.582650000 | 6 | 7.931379000 | 16.325534000 | 10.581995000 |

|    |             |              |              |   |              |              |              |
|----|-------------|--------------|--------------|---|--------------|--------------|--------------|
| 7  | 3.931351000 | 12.062396000 | 13.974759000 | 8 | 6.851373000  | 8.152132000  | 10.901563000 |
| 7  | 5.600929000 | 14.403536000 | 14.334602000 | 8 | 7.069911000  | 9.619461000  | 13.232141000 |
| 6  | 6.834285000 | 12.877533000 | 16.555824000 | 6 | 4.974249000  | 5.916434000  | 7.954434000  |
| 6  | 6.719593000 | 14.001650000 | 11.580136000 | 7 | 9.122158000  | 7.948518000  | 12.880947000 |
| 6  | 7.189873000 | 12.229974000 | 17.756020000 | 7 | 7.433414000  | 5.731815000  | 12.097540000 |
| 6  | 8.219464000 | 15.065264000 | 10.047718000 | 6 | 6.301552000  | 5.946801000  | 14.825159000 |
| 1  | 8.934182000 | 14.990991000 | 9.229692000  | 6 | 6.229691000  | 7.441664000  | 9.945779000  |
| 6  | 7.005415000 | 14.263319000 | 16.420634000 | 6 | 5.996172000  | 5.911217000  | 16.200417000 |
| 6  | 6.688830000 | 14.991773000 | 15.142470000 | 6 | 4.679714000  | 7.272644000  | 8.129048000  |
| 1  | 6.432795000 | 16.036177000 | 15.387270000 | 1 | 3.942815000  | 7.739788000  | 7.477709000  |
| 1  | 7.576060000 | 15.011939000 | 14.498891000 | 6 | 6.095420000  | 4.814157000  | 14.023621000 |
| 6  | 3.330763000 | 13.344646000 | 14.459055000 | 6 | 6.364110000  | 4.815037000  | 12.542069000 |
| 1  | 2.882980000 | 13.853239000 | 13.599910000 | 1 | 6.616596000  | 3.787756000  | 12.230703000 |
| 6  | 6.401547000 | 15.249020000 | 12.123096000 | 1 | 5.457636000  | 5.110400000  | 12.001656000 |
| 6  | 7.718649000 | 12.988790000 | 18.792720000 | 6 | 9.721596000  | 6.594967000  | 12.656912000 |
| 1  | 7.997111000 | 12.485539000 | 19.717026000 | 1 | 10.143653000 | 6.577052000  | 11.647655000 |
| 6  | 7.899557000 | 14.371476000 | 18.686660000 | 6 | 6.553773000  | 6.091919000  | 9.784961000  |
| 6  | 7.525808000 | 14.985927000 | 17.495012000 | 6 | 5.478961000  | 4.739757000  | 16.739243000 |
| 1  | 7.647734000 | 16.062973000 | 17.390411000 | 1 | 5.239204000  | 4.716106000  | 17.800884000 |
| 6  | 1.902565000 | 11.565066000 | 12.475669000 | 6 | 5.261402000  | 3.596085000  | 15.964385000 |
| 1  | 1.687667000 | 11.220372000 | 11.459711000 | 6 | 5.587562000  | 3.655538000  | 14.612779000 |
| 1  | 1.393684000 | 12.525806000 | 12.605989000 | 1 | 5.437823000  | 2.774880000  | 13.990034000 |
| 1  | 1.452513000 | 10.840226000 | 13.160329000 | 6 | 11.104842000 | 9.118061000  | 11.737572000 |
| 6  | 4.364491000 | 14.259869000 | 15.116108000 | 1 | 11.290985000 | 9.910604000  | 11.006576000 |
| 1  | 3.901777000 | 15.246841000 | 15.282332000 | 1 | 11.603402000 | 8.215072000  | 11.369996000 |
| 1  | 4.633333000 | 13.867123000 | 16.097612000 | 1 | 11.588817000 | 9.424238000  | 12.669426000 |
| 6  | 7.009931000 | 16.397920000 | 11.625326000 | 6 | 8.696313000  | 5.469221000  | 12.802735000 |
| 1  | 6.754708000 | 17.365051000 | 12.055424000 | 1 | 9.149866000  | 4.534208000  | 12.434284000 |
| 6  | 7.636922000 | 13.893282000 | 10.522815000 | 1 | 8.464955000  | 5.314176000  | 13.857275000 |
| 6  | 3.413924000 | 11.666039000 | 12.631832000 | 6 | 5.923508000  | 5.340304000  | 8.797046000  |
| 1  | 3.876472000 | 10.699298000 | 12.415597000 | 1 | 6.184232000  | 4.289706000  | 8.679390000  |
| 1  | 3.818760000 | 12.381827000 | 11.911649000 | 6 | 5.283578000  | 8.055396000  | 9.109529000  |
| 6  | 3.608104000 | 11.007642000 | 15.000433000 | 6 | 9.598267000  | 8.950382000  | 11.881016000 |
| 1  | 2.963885000 | 10.255261000 | 14.539356000 | 1 | 9.142863000  | 9.899608000  | 12.176709000 |
| 1  | 4.524045000 | 10.503828000 | 15.304347000 | 1 | 9.158834000  | 8.672291000  | 10.919760000 |
| 6  | 5.336691000 | 15.280466000 | 13.171475000 | 6 | 9.495176000  | 8.373844000  | 14.276588000 |
| 1  | 5.171273000 | 16.310981000 | 13.523891000 | 1 | 10.149380000 | 9.246970000  | 14.215158000 |
| 1  | 4.399351000 | 14.937655000 | 12.721679000 | 1 | 8.599466000  | 8.678501000  | 14.815913000 |
| 6  | 2.904910000 | 11.718842000 | 16.152228000 | 6 | 7.649936000  | 5.549703000  | 10.644072000 |
| 1  | 3.632450000 | 12.023671000 | 16.911937000 | 1 | 7.813434000  | 4.480887000  | 10.433520000 |
| 1  | 2.170242000 | 11.074354000 | 16.642327000 | 1 | 8.577693000  | 6.074027000  | 10.392030000 |
| 6  | 2.272740000 | 12.941359000 | 15.489889000 | 6 | 10.207877000 | 7.187438000  | 14.916445000 |
| 1  | 2.047920000 | 13.750177000 | 16.192785000 | 1 | 9.490185000  | 6.553077000  | 15.447286000 |
| 1  | 1.339737000 | 12.666637000 | 14.988664000 | 1 | 10.962060000 | 7.506361000  | 15.640967000 |
| 6  | 6.995884000 | 10.748758000 | 17.872737000 | 6 | 10.808304000 | 6.443357000  | 13.725222000 |
| 1  | 5.935454000 | 10.477528000 | 17.815514000 | 1 | 11.037798000 | 5.394026000  | 13.937143000 |
| 1  | 7.493025000 | 10.226550000 | 17.049343000 | 1 | 11.733323000 | 6.927515000  | 13.397339000 |
| 1  | 7.392885000 | 10.374159000 | 18.819750000 | 6 | 6.229155000  | 7.134564000  | 17.033979000 |
| 6  | 8.495328000 | 15.160640000 | 19.818662000 | 1 | 7.290088000  | 7.408490000  | 17.055467000 |
| 1  | 8.097754000 | 14.837802000 | 20.786222000 | 1 | 5.696451000  | 7.995797000  | 16.618422000 |
| 1  | 9.584274000 | 15.037297000 | 19.859989000 | 1 | 5.895534000  | 6.977498000  | 18.062925000 |
| 1  | 8.291800000 | 16.229774000 | 19.711272000 | 6 | 4.678869000  | 2.351199000  | 16.572742000 |
| 6  | 7.961631000 | 12.547806000 | 9.952939000  | 1 | 5.119173000  | 2.138915000  | 17.552330000 |
| 1  | 8.347298000 | 11.888690000 | 10.736610000 | 1 | 3.596531000  | 2.449052000  | 16.719878000 |
| 1  | 7.066134000 | 12.065655000 | 9.547046000  | 1 | 4.843899000  | 1.479184000  | 15.933733000 |
| 1  | 8.704305000 | 12.627479000 | 9.154843000  | 6 | 4.951016000  | 9.502490000  | 9.298527000  |
| 6  | 8.612026000 | 17.557634000 | 10.053779000 | 1 | 4.581892000  | 9.675493000  | 10.313903000 |
| 1  | 9.665086000 | 17.592896000 | 10.357127000 | 1 | 5.839458000  | 10.130765000 | 9.176853000  |
| 1  | 8.591395000 | 17.589742000 | 8.959406000  | 1 | 4.193111000  | 9.829011000  | 8.581671000  |
| 1  | 8.132825000 | 18.468153000 | 10.424253000 | 6 | 4.270421000  | 5.106353000  | 6.901489000  |
| 23 | 6.875673000 | 7.900320000  | 12.710042000 | 1 | 3.236383000  | 4.885746000  | 7.192188000  |
| 17 | 4.552522000 | 7.725150000  | 12.661350000 | 1 | 4.229195000  | 5.639445000  | 5.945997000  |
| 8  | 6.832546000 | 7.070225000  | 14.329525000 | 1 | 4.773903000  | 4.150748000  | 6.730119000  |

## O<sub>2</sub>

|   |              |               |               |
|---|--------------|---------------|---------------|
| 8 | -4.142221000 | -11.909433000 | -10.400329000 |
| 8 | -4.142221000 | -11.909433000 | -9.197706000  |

## TEMPO

|   |              |             |             |   |              |             |             |
|---|--------------|-------------|-------------|---|--------------|-------------|-------------|
| 7 | 1.787881000  | 5.735048000 | 2.786953000 | 1 | 1.660817000  | 8.894420000 | 2.369257000 |
| 6 | 0.589927000  | 6.443963000 | 3.317912000 | 1 | 2.310115000  | 9.427819000 | 3.908825000 |
| 6 | 3.024271000  | 6.410078000 | 2.300419000 | 1 | 2.139490000  | 7.517414000 | 0.621440000 |
| 8 | 1.573965000  | 4.572097000 | 2.313021000 | 1 | 2.537028000  | 5.821331000 | 0.283573000 |
| 6 | 1.011517000  | 7.712459000 | 4.068673000 | 1 | 3.826936000  | 7.040426000 | 0.387049000 |
| 6 | -0.106672000 | 5.483475000 | 4.281247000 | 1 | 0.048045000  | 7.530276000 | 1.487162000 |
| 6 | -0.357092000 | 6.765095000 | 2.154584000 | 1 | -1.315136000 | 7.127394000 | 2.540820000 |
| 6 | 3.294466000  | 7.679153000 | 3.116439000 | 1 | -0.533955000 | 5.857171000 | 1.572456000 |
| 6 | 2.867111000  | 6.722474000 | 0.806589000 | 1 | 0.565726000  | 5.201616000 | 5.097092000 |
| 6 | 4.174635000  | 5.421748000 | 2.488816000 | 1 | -0.413251000 | 4.575739000 | 3.759611000 |
| 6 | 2.054867000  | 8.534688000 | 3.327763000 | 1 | -0.989308000 | 5.968146000 | 4.709936000 |
| 1 | 4.088202000  | 8.242718000 | 2.612540000 | 1 | 4.269671000  | 5.138915000 | 3.541425000 |
| 1 | 3.690067000  | 7.388777000 | 4.099063000 | 1 | 5.112762000  | 5.884177000 | 2.166832000 |
| 1 | 1.424850000  | 7.422578000 | 5.044033000 | 1 | 4.001091000  | 4.516813000 | 1.904856000 |
| 1 | 0.109463000  | 8.300873000 | 4.272186000 |   |              |             |             |

## TEMPO-CH<sub>2</sub>Ph

|   |              |             |             |   |              |              |              |
|---|--------------|-------------|-------------|---|--------------|--------------|--------------|
| 7 | 1.332750000  | 6.057727000 | 1.769699000 | 1 | -0.701103000 | 7.665901000  | 1.477584000  |
| 6 | 0.415623000  | 6.450078000 | 2.888891000 | 1 | -0.177631000 | 4.393334000  | 3.326645000  |
| 6 | 2.581960000  | 6.875202000 | 1.618855000 | 1 | -1.210327000 | 5.219056000  | 2.132637000  |
| 8 | 1.792036000  | 4.739652000 | 2.109476000 | 1 | -1.328759000 | 5.631551000  | 3.849674000  |
| 6 | 1.181174000  | 6.623849000 | 4.211551000 | 1 | 3.789938000  | 5.169430000  | 0.972343000  |
| 6 | -0.633158000 | 5.346535000 | 3.054228000 | 1 | 4.415347000  | 6.754485000  | 0.496517000  |
| 6 | -0.357085000 | 7.721691000 | 2.514070000 | 1 | 3.022718000  | 6.073808000  | -0.355931000 |
| 6 | 3.312416000  | 7.039063000 | 2.962196000 | 6 | 1.395093000  | 3.824793000  | 1.111121000  |
| 6 | 2.248510000  | 8.236258000 | 0.992041000 | 6 | 2.021153000  | 2.482257000  | 1.384709000  |
| 6 | 3.503393000  | 6.162815000 | 0.623876000 | 6 | 2.920902000  | 2.282585000  | 2.431430000  |
| 6 | 2.396736000  | 7.535504000 | 4.076120000 | 1 | 3.169253000  | 3.115057000  | 3.080606000  |
| 1 | 4.164031000  | 7.717089000 | 2.826509000 | 6 | 3.489244000  | 1.027553000  | 2.642171000  |
| 1 | 3.725440000  | 6.063347000 | 3.246844000 | 1 | 4.187983000  | 0.886428000  | 3.462223000  |
| 1 | 1.513849000  | 5.632682000 | 4.543971000 | 6 | 3.166891000  | -0.039798000 | 1.811653000  |
| 1 | 0.493124000  | 7.002189000 | 4.977636000 | 1 | 3.611194000  | -1.016995000 | 1.977286000  |
| 1 | 2.080867000  | 8.568436000 | 3.880337000 | 6 | 2.267054000  | 0.153035000  | 0.764926000  |
| 1 | 2.946419000  | 7.566089000 | 5.023907000 | 1 | 2.006572000  | -0.674225000 | 0.110621000  |
| 1 | 1.861329000  | 8.968637000 | 1.700093000 | 6 | 1.698887000  | 1.403516000  | 0.555893000  |
| 1 | 1.522218000  | 8.115644000 | 0.183540000 | 1 | 0.995877000  | 1.546331000  | -0.262366000 |
| 1 | 3.163066000  | 8.659875000 | 0.565943000 | 1 | 1.702577000  | 4.189918000  | 0.122206000  |
| 1 | 0.212788000  | 8.641622000 | 2.640553000 | 1 | 0.299937000  | 3.730674000  | 1.088887000  |
| 1 | -1.236566000 | 7.800513000 | 3.160399000 |   |              |              |              |

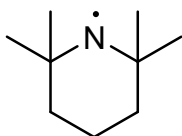

|   |             |             |             |   |              |             |             |
|---|-------------|-------------|-------------|---|--------------|-------------|-------------|
| 7 | 1.772079000 | 5.711174000 | 2.749141000 | 6 | 1.012216000  | 7.737193000 | 4.065784000 |
| 6 | 0.647658000 | 6.444200000 | 3.311667000 | 6 | -0.052589000 | 5.472358000 | 4.268465000 |
| 6 | 2.980033000 | 6.411659000 | 2.336977000 | 6 | -0.321213000 | 6.754289000 | 2.152272000 |

|   |             |             |             |   |              |             |             |
|---|-------------|-------------|-------------|---|--------------|-------------|-------------|
| 6 | 3.292757000 | 7.702442000 | 3.116577000 | 1 | 2.506158000  | 5.820901000 | 0.296767000 |
| 6 | 2.840162000 | 6.714540000 | 0.830898000 | 1 | 3.811721000  | 7.019361000 | 0.427480000 |
| 6 | 4.127559000 | 5.411295000 | 2.517183000 | 1 | 0.064237000  | 7.531172000 | 1.487347000 |
| 6 | 2.058463000 | 8.564303000 | 3.334167000 | 1 | -1.277934000 | 7.099057000 | 2.558836000 |
| 1 | 4.081333000 | 8.254549000 | 2.591095000 | 1 | -0.498887000 | 5.853447000 | 1.558734000 |
| 1 | 3.704716000 | 7.428896000 | 4.097865000 | 1 | 0.623302000  | 5.176848000 | 5.076801000 |
| 1 | 1.411053000 | 7.466649000 | 5.053259000 | 1 | -0.357858000 | 4.568000000 | 3.734982000 |
| 1 | 0.097541000 | 8.314540000 | 4.246668000 | 1 | -0.939006000 | 5.938183000 | 4.713149000 |
| 1 | 1.665830000 | 8.928159000 | 2.375863000 | 1 | 4.217148000  | 5.117209000 | 3.567427000 |
| 1 | 2.314657000 | 9.456094000 | 3.917299000 | 1 | 5.079040000  | 5.852265000 | 2.200132000 |
| 1 | 2.125096000 | 7.517729000 | 0.635260000 | 1 | 3.941361000  | 4.509088000 | 1.928134000 |

## 2,2,6,6-tetramethylpiperidine

|   |              |             |             |   |              |             |             |
|---|--------------|-------------|-------------|---|--------------|-------------|-------------|
| 7 | 1.874387000  | 5.725187000 | 2.994980000 | 1 | 2.331750000  | 9.414762000 | 3.959327000 |
| 6 | 0.632826000  | 6.432640000 | 3.322354000 | 1 | 2.039936000  | 7.498851000 | 0.676421000 |
| 6 | 2.996865000  | 6.398075000 | 2.334250000 | 1 | 2.440561000  | 5.817782000 | 0.307602000 |
| 6 | 1.004481000  | 7.714814000 | 4.080838000 | 1 | 3.716864000  | 7.040444000 | 0.378365000 |
| 6 | -0.148419000 | 5.504289000 | 4.256138000 | 1 | 0.150072000  | 7.524986000 | 1.464372000 |
| 6 | -0.270458000 | 6.757149000 | 2.117142000 | 1 | -1.248733000 | 7.115279000 | 2.457365000 |
| 6 | 3.307817000  | 7.681049000 | 3.117900000 | 1 | -0.437970000 | 5.859262000 | 1.511541000 |
| 6 | 2.779495000  | 6.712634000 | 0.841889000 | 1 | 0.470686000  | 5.223583000 | 5.112437000 |
| 6 | 4.187311000  | 5.441632000 | 2.443426000 | 1 | -0.444349000 | 4.585870000 | 3.734527000 |
| 6 | 2.068398000  | 8.535314000 | 3.360198000 | 1 | -1.061720000 | 5.987877000 | 4.618442000 |
| 1 | 4.079967000  | 8.249691000 | 2.585970000 | 1 | 4.352971000  | 5.165247000 | 3.488157000 |
| 1 | 3.730473000  | 7.393380000 | 4.089546000 | 1 | 5.098540000  | 5.901541000 | 2.046652000 |
| 1 | 1.392693000  | 7.426663000 | 5.066526000 | 1 | 4.003811000  | 4.522977000 | 1.873004000 |
| 1 | 0.098092000  | 8.307977000 | 4.250973000 | 1 | 1.657906000  | 4.860813000 | 2.507222000 |
| 1 | 1.677148000  | 8.922752000 | 2.410665000 |   |              |             |             |

## Toluene

|   |              |              |              |   |              |              |              |
|---|--------------|--------------|--------------|---|--------------|--------------|--------------|
| 6 | 1.182249000  | -0.188542000 | 0.073516000  | 1 | 1.808648000  | -2.243962000 | 0.109773000  |
| 6 | 0.963782000  | -1.562717000 | 0.061006000  | 1 | -0.505660000 | -3.136250000 | -0.015117000 |
| 6 | -0.332979000 | -2.064088000 | -0.008607000 | 1 | -2.423213000 | -1.560575000 | -0.112032000 |
| 6 | -1.406823000 | -1.180017000 | -0.063384000 | 1 | -2.026887000 | 0.877750000  | -0.090145000 |
| 6 | -1.182741000 | 0.193288000  | -0.050715000 | 1 | 0.470908000  | 2.562729000  | -1.030784000 |
| 6 | 0.113889000  | 0.710483000  | 0.014643000  | 1 | 1.265317000  | 2.460134000  | 0.540235000  |
| 6 | 0.354674000  | 2.194248000  | -0.004340000 | 1 | -0.479165000 | 2.742013000  | 0.444168000  |
| 1 | 2.198003000  | 0.195486000  | 0.131761000  |   |              |              |              |

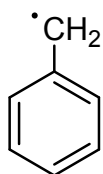

|   |              |              |              |   |              |              |              |
|---|--------------|--------------|--------------|---|--------------|--------------|--------------|
| 6 | 1.136309000  | -0.147615000 | -0.069772000 | 1 | 2.137573000  | 0.273466000  | -0.108158000 |
| 6 | 0.960623000  | -1.518313000 | -0.018335000 | 1 | 1.827750000  | -2.172805000 | -0.016657000 |
| 6 | -0.324918000 | -2.066570000 | 0.031398000  | 1 | -0.458443000 | -3.143250000 | 0.071754000  |
| 6 | -1.437462000 | -1.219281000 | 0.028599000  | 1 | -2.438079000 | -1.640654000 | 0.066840000  |
| 6 | -1.273051000 | 0.152804000  | -0.022519000 | 1 | -2.140942000 | 0.807111000  | -0.024578000 |
| 6 | 0.022534000  | 0.735433000  | -0.073259000 | 1 | 1.186273000  | 2.569266000  | -0.162694000 |
| 6 | 0.195681000  | 2.129414000  | -0.124426000 | 1 | -0.657027000 | 2.799585000  | -0.127013000 |
